# 1 Bacteria control cell volume by coupling cell-surface expansion to dry- 2 mass growth

3 Enno R. Oldewurtel<sup>1\*</sup>, Yuki Kitahara<sup>1,2</sup>, Baptiste Cordier<sup>1</sup>, Gizem Özbaykal<sup>1,2</sup>, and Sven van Teeffelen<sup>1\*</sup>

4 1. Morphogenesis and Microbial Growth Lab, Institut Pasteur, Paris, France

5 2. Université Paris Diderot, Sorbonne-Paris-Cité, Paris, France

6 \* To whom correspondence should be addressed: [enno.oldewurtel@gmail.com](mailto:enno.oldewurtel@gmail.com);

7 [sven.vanteeffelen@gmail.com](mailto:sven.vanteeffelen@gmail.com).

## 8 Abstract

9 Cells exhibit a high degree of intracellular crowding. To control the level of crowding during growth cells  
10 must increase their volumes in response to the accumulation of biomass. Using *Escherichia coli* as a model  
11 organism, we found that cells control cell volume indirectly, by increasing cell-surface area in proportion to  
12 biomass growth. Thus, dry-mass density, a readout of intracellular crowding, varies in proportion to the  
13 surface-to-volume ratio, both during the cell cycle and during perturbations such as nutrient shifts. On long  
14 time scales after shifts, initial dry-mass density is nearly restored by slow variations of the surface-to-mass  
15 ratio. Contrary to a long-standing paradigm, cell-envelope expansion is controlled independently of cell-  
16 wall synthesis but responds to the activity of cell-wall cleaving hydrolases. Finally, we observed rapid  
17 changes of Turgor pressure after nutrient shifts, which were likely responsible for initial changes of cell  
18 diameter and dry-mass-density. Together, our experiments reveal important regulatory relationships for  
19 cell volume and shape.

## 20 Main text

21 A high level of macromolecular crowding of about 30-40% (1, 2) is essential for cellular physiology as it  
22 impacts processes ranging from macromolecular diffusion via protein-DNA interactions to protein  
23 translation (3). A robust readout for the level of crowding is the cellular dry-mass density, the ratio of dry  
24 mass (protein, RNA, etc.) to cell volume. Previous experiments in the model bacterium *Escherichia coli*  
25 suggest that dry-mass density is approximately constant (4–6). Therefore, cells are often assumed to  
26 increase their volumes in perfect proportionality to dry mass (7, 8). To increase volume, cells must expand  
27 their envelopes. Because the surface-to-volume ratio of rod-shaped bacteria changes in a width- and  
28 length-dependent manner ( $S/V = 4/[W(1 - W/3L)]$ ), rates of surface and volume expansion differ during

29 the cell cycle and during transitions between growth conditions. For density maintenance cells would thus  
30 need to tightly adjust their rate of surface growth or modulate width.

31 To study volume regulation, we developed a method to measure absolute single-cell volume  $V$ , dry mass  $M$ ,  
32 and surface area  $S$  simultaneously and precisely during time-lapse microscopy. Volume and surface area  
33 are inferred from 2D cell contours obtained from phase-contrast or fluorescence images (Fig. 1A,S3). For  
34 dry-mass measurements we used Spatial Light Interference Microscopy (SLIM), a form of quantitative  
35 phase imaging (9) (Supplementary Note). The integrated optical phase shift of a cell is proportional to its  
36 dry mass (Fig 1B). To correct for cell-shape-dependent optical artifacts, we compared images to image  
37 simulations that are based on microscope parameters (10, 11).

38 As a validation of our method, we found that dry mass remained constant after hyper-osmotic shock,  
39 demonstrating that mass measurements are independent of cell shape (Fig. 1C). Furthermore, mass density  
40 increased both with increasing medium osmolarity or upon entering stationary phase, in agreement with  
41 (12–14) (Fig. 1D,E). Mass density measurements were also confirmed through immersive refractometry  
42 (15) (Fig. S6).

43 We then applied our method to measure distributions of  $M$ ,  $V$ , and dry-mass density  $\rho = M/V$  in two  
44 different *E. coli* strains (MG1655 and NCM3722) growing exponentially in different growth media of equal  
45 osmolarity (Fig. 2A,S7). Despite five-fold changes in average cell mass and volume (Fig. S7), the average  
46 density  $\langle\rho\rangle$  varied by less than 15% between conditions – in a strain- and media-dependent manner (Fig.  
47 2B). We confirmed these variations by refractive-index modulation (Fig. S8).

48 Remarkably, cell-to-cell variations within conditions were smaller than 3-6% (CV) (Fig. 2B). Furthermore,  
49 up to half of the variations between non-dividing cells could be explained by a deterministic decrease of  
50 density as a function of cell length (Fig. 2C), which was also observed in time lapses of filamenting cells  
51 (Fig. 2H,S9) and through immersive refractometry (Fig. S10). To understand this seemingly complex  
52 dependency we investigated the possibility that cells might expand their surface areas rather than their  
53 volumes in direct proportion to biomass. To that end we decomposed mass density into surface-to-volume-  
54 and surface-to-mass ratios,

$$55 \quad \rho = (S/V)/(S/M). \quad (1)$$

56 If cells grew in surface as they grow in mass,  $S/M$  should remain constant while density should vary in  
57 proportion to  $S/V$ . Indeed,  $S/M$  showed hardly any dependency on length (Fig. 2E). Furthermore, the  
58 length-dependent behavior of  $\rho$  was well described by the product of the average surface-to-mass ratio  
59  $\langle S/M \rangle$  and the surface-to-volume ratio of a model spherocylinder of width  $\langle W \rangle$ , where  $W$  is cell width. As a

60 consequence, the volume growth rate  $\lambda_V = d(\log V)/dt$  of short cells exceeded the constant mass-growth  
61 rate  $\lambda_M = d(\log M)/dt$  by about 10% (Fig. 2G), in agreement with our prediction. In dividing cells, we then  
62 observed an increase of  $\rho$  towards the end of the cell cycle, due to the increase of  $\langle S/V \rangle$  by septum  
63 formation (Fig. 2I).

64 While  $\langle S/M \rangle$  is independent of length, it is strain- and media-dependent (Fig. 2E,S7). Specifically, the  
65 population-averaged  $\langle S/M \rangle$  was nearly proportional to  $\langle S/V \rangle$ , such that variations of  $\langle \rho \rangle$  between  
66 conditions remained small.

67 Next, we investigated how surface and mass were coupled during transitions between different growth  
68 conditions. First, we applied a nutrient upshift from a minimal medium containing mannose as carbon  
69 source (MM+mannose) to the same medium containing glucose and casamino acids (CAA)  
70 (MM+glucose+CAA) in batch culture and took regular single-cell snapshots (Fig 3A). Mass growth rate  
71 increased rapidly after the shift. Yet,  $\langle S/M \rangle$  remained constant during about 50 min of growth,  
72 corresponding to 0.5 mass doublings. At the same time, mass density dropped by about 10% due to a  
73 similar decrease of  $S/V$ , largely due to changes of width. Only afterwards,  $\langle S/M \rangle$  started to decrease,  
74 reaching its new steady-state value after  $\sim 3.3$  mass doublings. Therefore, cells change  $S/V$  and  $S/M$  on  
75 different time scales, which leads to transient and non-continuous changes of  $\rho$ .

76 To follow single-cell behavior we applied the same shift to cells growing under the microscope, while  
77 inhibiting cell division (Fig. 3B,S13). During about 50 min after the shift, cell volume increased about 15%  
78 faster than cell mass, which led to a reduction of mass density by a similar amount as during the batch  
79 experiment. Despite slight variations of  $\langle S/M \rangle$ , possibly due to cell filamentation or surface attachment  
80 during microscopy,  $\langle S/M \rangle$  was equal to its pre-shift value after 50 min, in agreement with the batch  
81 experiment. We observed the same behavior in a different shift from MM+glucose to RDM (Fig. 3C). Here,  
82 surface and mass grew at the same rate, while volume increased faster than mass and length increased  
83 more slowly, suggesting that not only volume but also length is indirectly controlled by surface and width.  
84 The dependency of length on surface and width is further supported by inverse single-cell correlations  
85 between rates of cell elongation and widening during steady-state growth (Fig. S12).

86 Interestingly, we observed striking deviations from the proportionality between mass and surface during  
87 the first few minutes after the shifts. Here, the rates of surface and volume expansion  $\lambda_A = d(\log A)/dt$  and  
88  $\lambda_V$  spiked due to rapid expansion of both cell length and width of about 1.5% each. This expansion is  
89 reminiscent of a hypo-osmotic shock (16), even though medium osmolarity was maintained constant. This  
90 observation suggests that Turgor pressures increased, and that initial surface expansion was largely elastic  
91 while the subsequent cell-diameter increase requires cell-wall remodeling. We observed a similar increase

92 of cell dimensions when transiently increasing Turgor by continuously decreasing medium osmolarity  
93 (Fig. S14). In striking similarity to the nutrient upshift, these cells also showed a subsequent increase of cell  
94 diameter of about 10%, suggesting that cell-diameter changes during nutrient shifts might also be caused  
95 by Turgor.

96 We also investigated the dynamics of shape and mass during a corresponding nutrient downshift, both  
97 through time-lapse and batch-culture experiments (Fig. 3D,E). Similar to the upshift, we identified three  
98 phases. During the initial change of mass growth (<10 min), cells partially shrunk in volume due a sudden  
99 drop of cell diameter, demonstrating that osmotic pressure was reduced, even though medium osmolarity  
100 was maintained constant. We observed qualitatively similar but faster changes of Turgor upon depletion of  
101 glucose, using alpha-methylglucoside (alphaMG) (Fig. S15). After about 100 min (0.5 doublings)  $\langle S/M \rangle$  had  
102 reached its pre-shift value (Fig. 3D,E), before increasing towards its new steady-state value. We therefore  
103 reasoned that the transient decrease of  $\langle S/M \rangle$  was due to a concomitant reduction of Turgor, while surface  
104 material and dry mass might have increased at equal rates. Cell diameter and  $S/M$  reached their new  
105 steady-state-values after about 3.5h and 6h, respectively, consistent with the independence of  $S/V$  and  $S/M$   
106 observed in the upshift experiment.

107 The robust coupling between surface and mass after sudden growth-rate changes gives support to a simple  
108 surface-growth law of the form

$$109 \quad dS/dt = \alpha dM/dt, \quad (2)$$

110 where alpha is a growth-condition-dependent coupling constant. During steady-state exponential growth  
111  $\alpha_{ss} = \langle S/M \rangle_{ss}$ . Eq. (2) is mathematically equivalent to the equation  $dS/dt = \beta M$ , with  $\beta = \alpha \lambda_M$ . However,  
112 the former model is more appropriate, because  $\alpha$  changes slowly during shifts, while  $\beta$  is nearly inversely  
113 proportional to  $\lambda_M$  (Fig. S16). Notably, our observations overturn the recent suggestion that surface grows  
114 in proportion to volume ( $dS/dt = \beta'V$ ), and that cell diameter depends on  $S/V$  and a constant mass density  
115 (7, 8). Here, we found instead that  $S/V$  and  $\rho$  change according to independent variations of  $W$  and  $S/M$ .

116 Next, we tested whether surface-to-mass coupling was also robust with respect to non-physiological  
117 perturbations of cell dimensions. To that end, we inhibited the peptidoglycan (PG)-inserting multi-enzyme  
118 Rod complex responsible for rod-like cell shape, using the beta-lactam mecillinam (17) (Fig. 3F). Drug  
119 treatment led to rapid cell widening, as expected. Despite the severe perturbation, the rates of mass and  
120 surface growth remained nearly unaffected for about one mass mass-doubling time. As a consequence, dry-  
121 mass density dropped up to 30%, supporting our finding that cells grow in surface rather than volume.

122 Rod-complex inhibition is known to cause a strong reduction of the rate of PG insertion (18, 19). Therefore,  
123 our experiment demonstrates that surface expands independently of the rate of PG insertion, contrary to a  
124 major paradigm (7, 20, 21). To test whether surface expansion could proceed even upon arrest of cell-wall  
125 insertion, we treated cells with drugs that inhibit PG-precursor synthesis (D-cycloserine, Fosfomycin) or  
126 cross-linking (Vancomycin) (Fig. 4). For the latter, we used an outer-membrane-permeable *lptD4213*  
127 mutant (22, 23). Cell-wall synthesis was severely reduced within 5-15 min, depending on the drug,  
128 according to the PG-synthesis-dependent rotation of MreB-actin (24) (Fig. 4A, Movies S1-3). Surprisingly,  
129 cells grew for an additional 15-40% in surface and mass at nearly unperturbed rates, up to the point of lysis  
130 (Fig. 4B). This finding was supported by an independent batch experiment (Fig. S17). Even when we  
131 combined Vancomycin treatment with a complex growth-rate shift, cell-envelope expansion proceeded  
132 normally (Fig. 4C). Therefore, PG synthesis is neither rate-limiting nor rate-determining for cell-wall  
133 expansion.

134 Surface expansion during drug treatment requires the activity of lytic enzymes that cleave PG. Accordingly,  
135 we observed a rapid increase of the rate of surface expansion (Fig. 4D) upon overexpression of the DD-  
136 endopeptidase MepS, which cleaves cell-wall crosslinks (25). However, surface rate increased only  
137 transiently (~5 min), demonstrating that enzyme activity is tightly regulated at the molecular level.

138 Together, we found a robust coupling between surface area increase and dry mass growth. We identified  
139 two independent variables for volume regulation: cell diameter and the surface-to-mass coupling constant  
140  $\alpha$ . All other shape variables depend on these two and on the process of cell division. We found that Turgor  
141 pressure played an important and potentially regulatory role for cell diameter. In the future, it will be  
142 interesting to identify the molecular mechanism underlying the relationship between intracellular mass  
143 density and  $\alpha$ .

## 144 Bibliography

- 145 1. S. Cayley, B. A. Lewis, H. J. Guttman, M. T. Record, *Journal of molecular biology*. **222**, 281–300 (1991).
- 146 2. S. B. Zimmerman, S. O. Trach, *Journal of molecular biology*. **222**, 599–620 (1991).
- 147 3. H.-X. Zhou, G. Rivas, A. P. Minton, *Annual Review of Biophysics*. **37**, 375–397 (2008).
- 148 4. H. E. Kubitschek, W. W. Baldwin, S. J. Schroeter, R. Graetzer, *Journal of Bacteriology*. **158**, 296–299  
149 (1984).
- 150 5. H. E. Kubitschek, W. W. Baldwin, R. Graetzer, *Journal of Bacteriology*. **155**, 1027–1032 (1983).
- 151 6. M. Basan *et al.*, *Molecular Systems Biology*. **11**, 836–836 (2015).
- 152 7. L. K. Harris, J. A. Theriot, *Cell*. **165**, 1479–1492 (2016).
- 153 8. N. Ojkic, D. Serbanescu, S. Banerjee, *eLife*. **8**, e47033 (2019).
- 154 9. Z. Wang *et al.*, *Opt Express*. **19**, 1016–1026 (2011).
- 155 10. T. Ursell *et al.*, *BMC Biol*. **15**, 17 (2017).
- 156 11. S. B. Mehta, C. J. R. Sheppard, *Journal of Modern Optics*. **57**, 718–739 (2010).

- 157 12. F. Feijó Delgado *et al.*, *PLoS ONE*. **8**, e67590 (2013).  
158 13. H. Makinoshima, A. Nishimura, A. Ishihama, *Molecular Microbiology*. **43**, 269–279 (2002).  
159 14. D. S. Cayley, H. J. Guttman, M. T. Record, *Biophysical journal*. **78**, 1748–64 (2000).  
160 15. B. Rappaz *et al.*, *Optics Express*. **13**, 9361 (2005).  
161 16. R. Buda *et al.*, *Proc Natl Acad Sci USA*. **113**, E5838–E5846 (2016).  
162 17. B. G. Spratt, *Proc Natl Acad Sci USA*. **72**, 2999–3003 (1975).  
163 18. T. Uehara, J. T. Park, *Journal of Bacteriology*. **190**, 3914–3922 (2008).  
164 19. H. Cho, T. Uehara, T. G. Bernhardt, *Cell*. **159**, 1300–1311 (2014).  
165 20. A. Typas, M. Banzhaf, C. A. Gross, W. Vollmer, *Nat Rev Microbiol*. **10**, 123–136 (2012).  
166 21. W. Vollmer, U. Bertsche, *Biochimica et Biophysica Acta (BBA) - Biomembranes*. **1778**, 1714–1734  
167 (2008).  
168 22. T. Wu *et al.*, *Cell*. **121**, 235–245 (2005).  
169 23. N. Ruiz, B. Falcone, D. Kahne, T. J. Silhavy, *Cell*. **121**, 307–317 (2005).  
170 24. S. van Teeffelen *et al.*, *PNAS*. **108**, 15822–15827 (2011).  
171 25. S. K. Singh, L. SaiSree, R. N. Amrutha, M. Reddy, *Molecular Microbiology*. **86**, 1036–1051 (2012).

## 172 **Acknowledgements**

173 We thank Nikolay Ouzounov and Zemer Gitai for strains NO34, NO53, Natasha Ruiz for strain NR693,  
174 Suckjoon Jun for plasmid pDB192, Richard Wheeler and Ivo Boneca for help with measuring mDAP  
175 incorporation, Waldemar Vollmer for the suggestion to digest sacculi with lysozyme, and Piernicola  
176 Spinicelli for technical support on phase microscopy. This work was supported by the European Research  
177 Council (ERC) under the Europe Union's Horizon 2020 research and innovation program [Grant Agreement  
178 No. (679980)], the French Government's Investissement d'Avenir program Laboratoire d'Excellence  
179 “Integrative Biology of Emerging Infectious Diseases” (ANR-10-LABX-62-IBEID), the Mairie de Paris  
180 “Emergence(s)” program, and the Volkswagen Foundation.

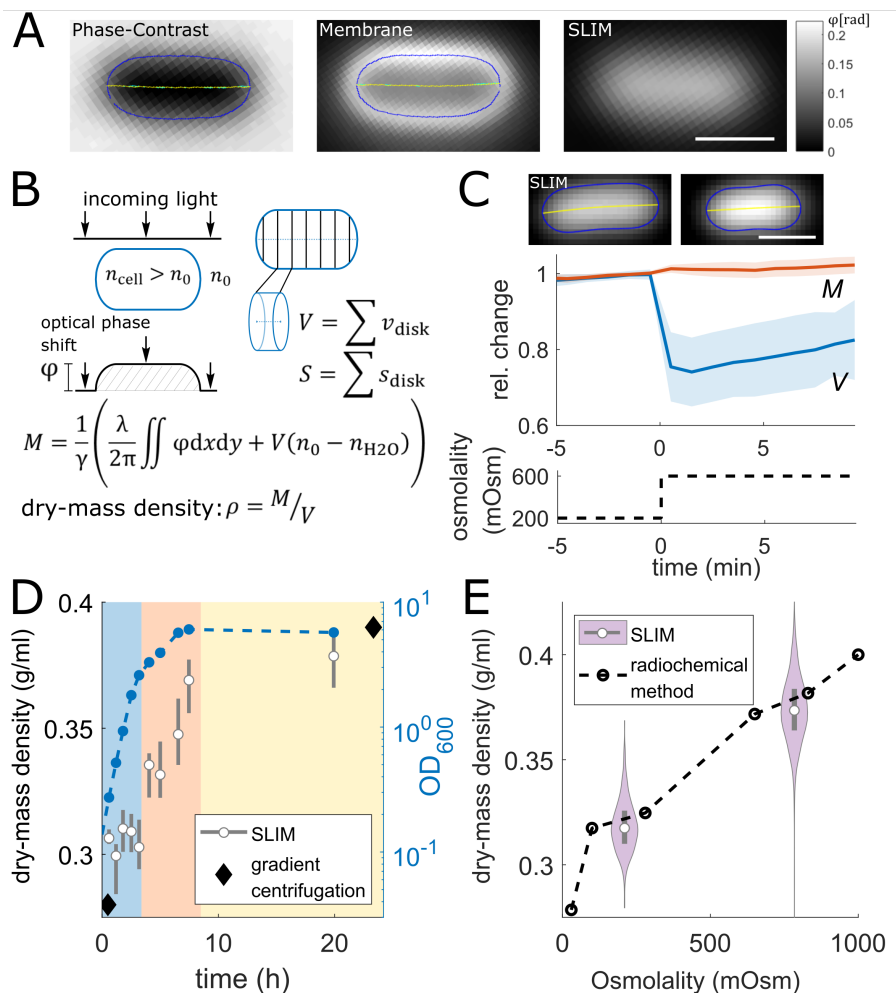

**Figure 1. Measuring bacterial dry mass and volume using quantitative phase microscopy.**

**A:** Phase-contrast image (left), membrane stain (middle), and quantitative phase image (right) of WT cell (MG1655) grown in MM+mannose with cell contour (blue) and centerline (yellow).

**B: Left:** Illustration of optical phase shift of light passing through a cell with refractive index  $n_{\text{cell}} > n_0$ .

**Right:** Volume and surface inference from calibrated 2D cell contour. Dry mass  $M$  equals the optical phase shift, corrected for  $n_0$ , divided by the refraction increment  $\gamma$ .

**C:** SLIM images before and after hyper-osmotic shock (top), relative changes of single-cell dry mass and volume (mean $\pm$ std) during hyper-osmotic shock (middle), medium osmolality (bottom).

**D:** Dry-mass density and optical density ( $\text{OD}_{600}$ ) during exponential growth (blue shade), during early (red) and late (yellow) stationary phase in LB. Comparison to values inferred from wet-mass densities (diamonds) (2).

**F:** Dry-mass density increase with osmolality in MM+glucose, comparing SLIM and radiochemical free-water measurements (dashed line) (3).

(grey rectangles=interquartile range; white circles=median; scale bars=1 $\mu\text{m}$ )

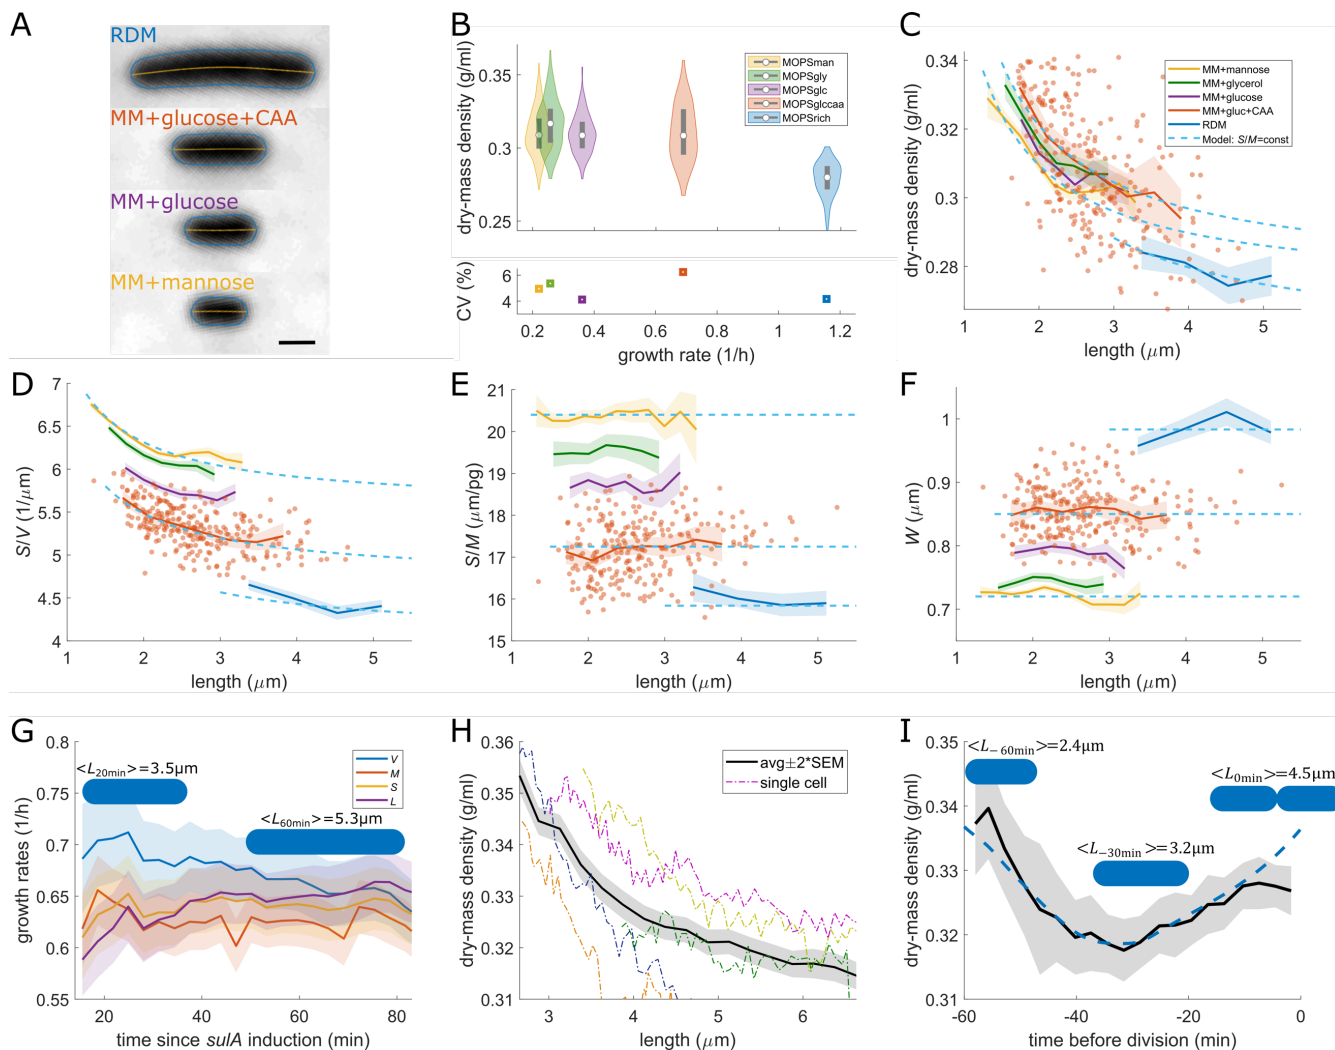

**Figure 2. Cells increase cell surface but not cell volume in proportion to dry mass.**

**A-F:** Snapshots of non-dividing WT cells (MG1655) in different media at 30C. **A:** Phase-contrast images. **B:** Dry-mass density (white circles=median; grey rectangles=interquartile range) and coefficient of variation (CV). **C-F:** Length dependencies of dry-mass density (C), surface-to-volume ratio (D), surface-to-mass ratio (E), and width (F).

**G-H:** Time lapse of filamenting cells (S290) in MM+glucose+CAA. **G:** Relative rates of volume, mass, surface, and length. **H:** Length dependency of dry-mass density.

**I:** Time lapse of dividing cells (MG1655) in MM+glucose+CAA. Dry-mass density (solid line) and model (dashed line).

(solid lines+shadings=average $\pm 2 * S.E.M.$ ; dots=single cell data)



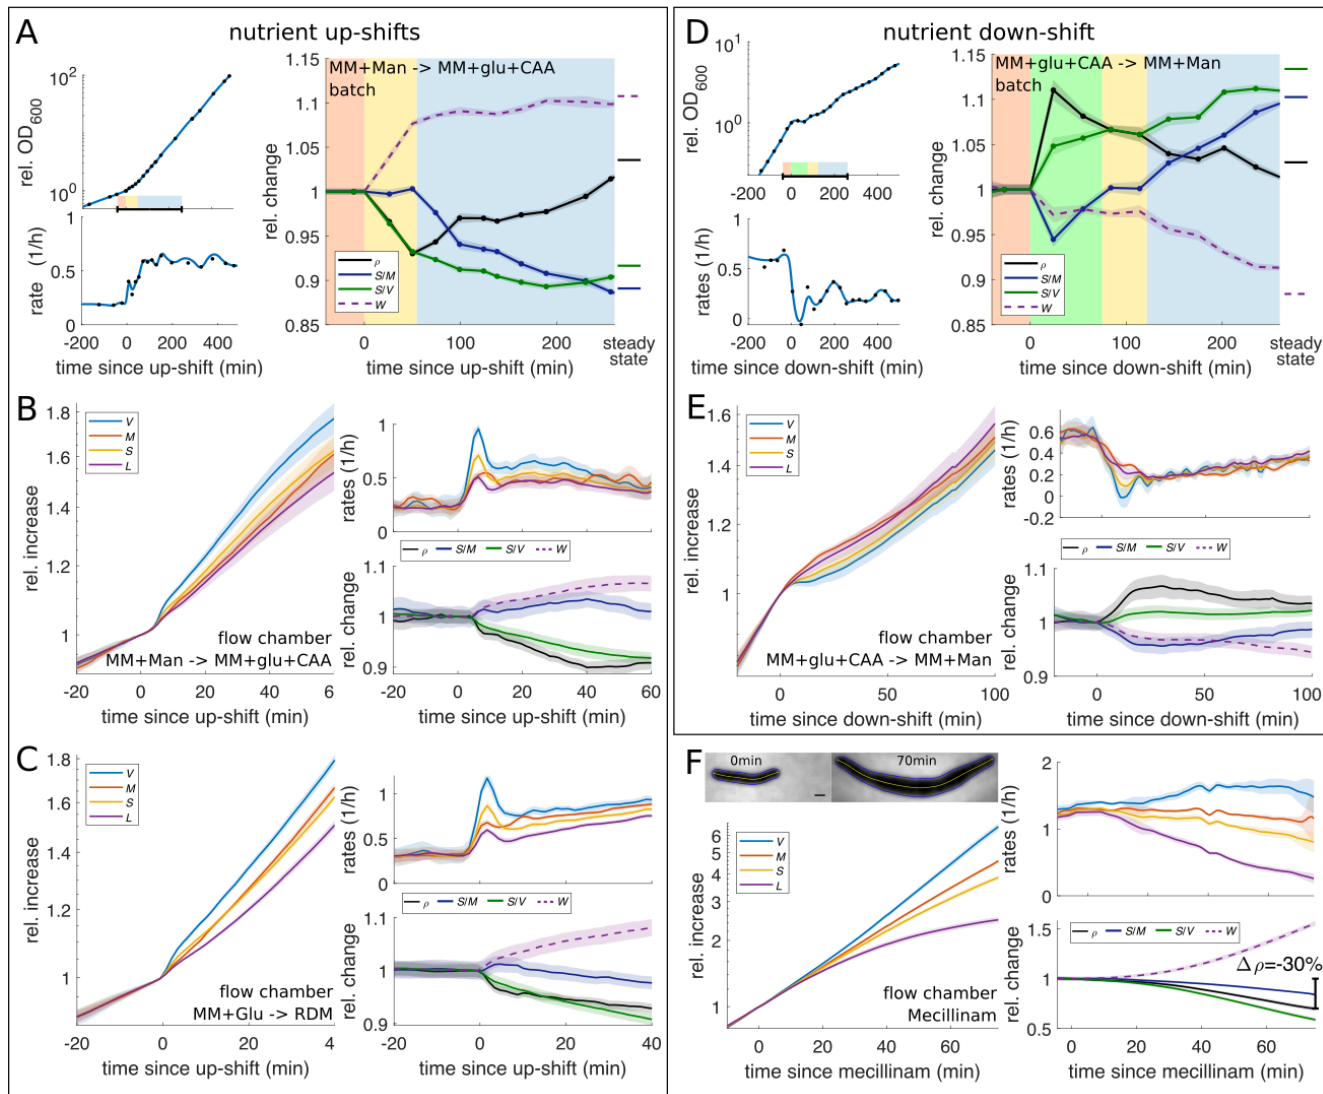

**Figure 3. Shift experiments demonstrate robust surface-to-mass coupling despite variations of growth-rate, Turgor, and cell shape.**

**A:** Nutrient upshift from MM+mannose to MM+glucose+CAA in batch culture of WT cells (MG1655). Left: Growth curve and relative rate. Right: Relative changes of dry-mass density, surface-to-mass- and surface-to-volume ratios, and width from single-cell snapshots (right). Shaded background:  $S/M$  constant (yellow),  $S/M$  approaching new steady state (blue).

**B:** Single-cell time lapse of the same nutrient shift as in A applied to filamenting cells (S290) in flow chamber. Relative increase (left) and single-cell rates (top-right) of volume, mass, surface, and length. Bottom-right: Same quantities as in A.

**C:** Nutrient upshift from MM+glucose to RDM. Otherwise same conditions as in B.

**D-E:** Nutrient downshift from MM+glucose+CAA to MM+mannose in batch culture (D) and flow chamber (E). Otherwise same conditions as in A, B.

**F:** Mecillinam treatment in RDM. Otherwise same conditions as in B,C,E. Top-left: Snapshots.

(solid lines+shadings=average $\pm$ 2\*S.E.M.)

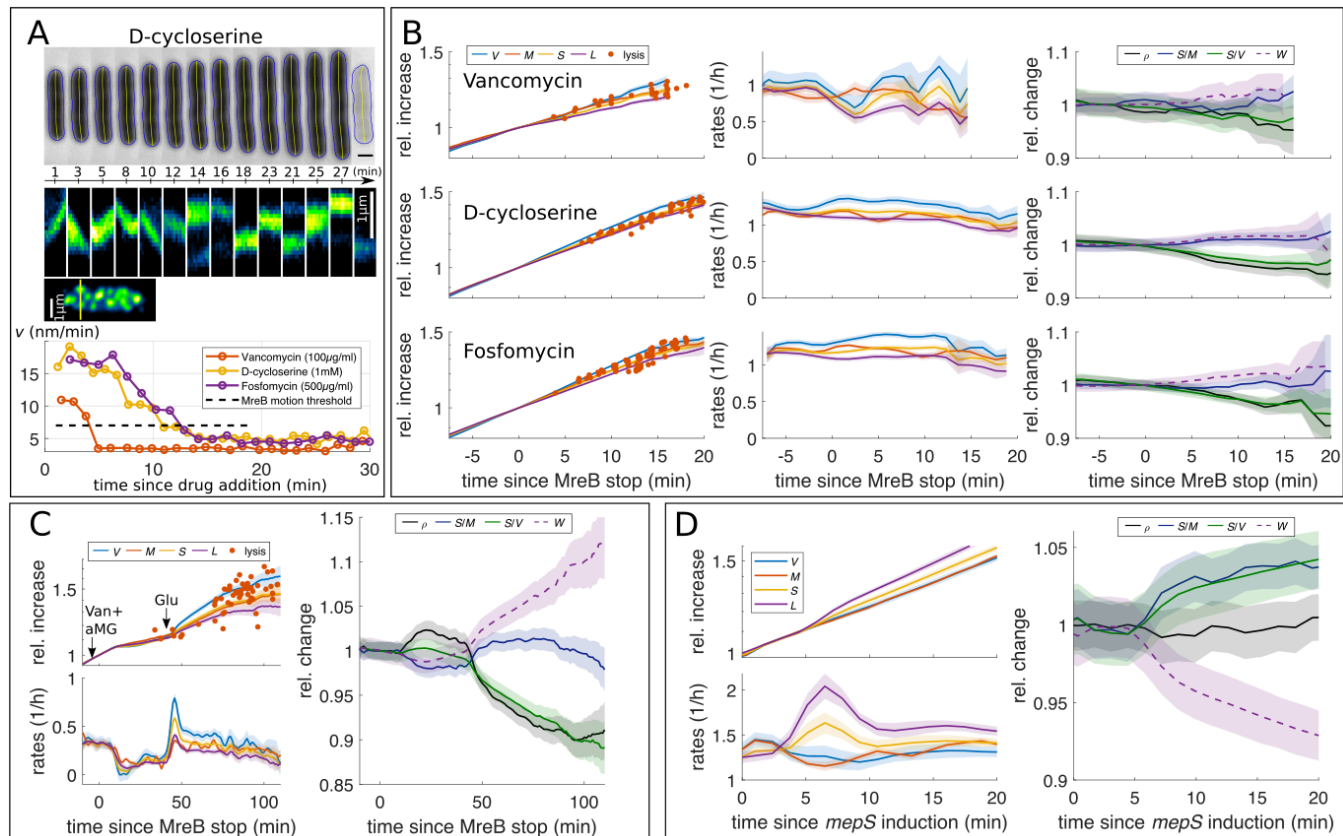

**Figure 4. Surface expansion is independent of cell-wall synthesis.**

**A:** D-cycloserine leads to sudden lysis (top), only after MreB motion is arrested according to kymographs (middle) (S257). Average speed of MreB filaments after treatment with D-cycloserine, Fosfomycin (S257), and Vancomycin (S382).

**B:** Growth after MreB-motion arrest is nearly unperturbed up to cell lysis. Red dots: single-cell mass at lysis. For description of lines see Fig 3B.

**C:** Complex nutrient shift during Vancomycin treatment demonstrates surface-area control in the absence of cross-linking (S382).

**D:** Overexpression of DD-endopeptidase MepS (B183) leads to transient increase of elongation and surface rates.

(solid lines+shadings=average $\pm$ 2\*S.E.M.)
